# Supplementary material
Source: publisher figshare collection journal article supplement (https://tandf.figshare.com/ndownloader/files/15630230)
Supplement: Supplementary file 1 [file 15630230]

**Search Strategy**

**PubMed**

**Search terms:**

((Inpatient* OR hospitalized OR long term residence OR community dweller OR community* OR long term care OR home care OR disability OR frail* OR elderly OR retirement OR long term)

AND

(Sara stedy OR standing aid OR transfer aid OR standing lift OR patient lift OR sit to stand OR sit to stand aid OR sit to stand manual aid OR sit to stand electric aid OR transfer support OR active assist transfer OR active assisted OR active transfer OR transfer)

AND

(Discharge time OR independence OR fall* OR physical function* OR quality of life OR walk* OR stand* OR transfers* OR discharge OR transfer safety OR transfer* OR mobility OR patient safety OR safety OR fall prevention OR falls prevention OR therapist safety OR caregiver safety))

**Identified**: 57784 results

**limit to humans**: 45651 results

**limit to clinical queries:**

- Systematic reviews - 1259 results, selected articles below
- Clinical Study category - 12809 results

**Limit scope to narrow:**

- 2386 results, selected articles below

1.       Nelson A, Collins J, Siddharthan K, Matz M, and Waters T. Link between safe patient handling and patient outcomes in long-term care. Rehabil Nurs (2008); 33(1): 33-43

2.       Baptiste A. Technology solutions for high-risk tasks in critical care. Crit Care Nurs Clin North Am (2007); 19(2):177-86

3.       Macens K, Rose A, and Mackenzie L. Pressure care practice and occupational therapy: findings of an exploratory study. Aust Occup Ther J (2011); 58(5):346-54

4.       Mayeda-Letourneau J. Safe patient handling and movement: a literature review. Rehabil Nurs (2014); 39(3):123-95.

5. Taylor J, Sims J, and Haines TP. The impact of manual handling on nursing home resident mobility during transfers on and off furniture: a systematic review. J Gerontol Nurs (2011); 37(8):38-56

6.       Pollock A, Gray C, Culham E, Durward BR, and Langhorne P. Interventions for improving sit-to-stand ability following stroke. Cochrane Database Syst Rev (2014); 26(5)

7.       Nelson A, and Baptiste AS. Update on evidence-based practices for safe patient handling and movement. Orthop Nurs (2006); 25(6):367-8

8.       Clemes SA, Haslam CO, and Haslam RA. What constitutes effective manual handling training? A systematic review. Occup Med (Lond) (2010); 60(2):101-7

9.       Wilson CB. Safer handling practice for nurses: a review of the literature. Br J Nurs (2001); 10(2):108-14

10. Mehrholz J, Thomas S, Burridge JH, Schmidt A, Scheffler B, Schellin R, et al. Fitness and mobility training in patients with Intensive Care Unit-acquired muscle weakness (FITonICU): study protocol for a randomised controlled trial. Trials (2016); 17(1):559

11.   Garg A, Miholland S, Deckow-Schaefer G, and Kapellusch JM. Justification for a minimal lift program in critical care. Crit Care Nurs Clin North Am (2007); 19(2):187-96

12.   Rockefeller K. Using technology to promote safe patient handling and rehabilitation. Rehabil Nurs (2008); 33(1):3-9

13.   Nelson A, Harwood KJ, Tracey CA, and Dunn KL. Myths and facts about safe patient handling in rehabilitation. Rehabil Nurs (2008); 33(1):10-7

14.   Le Bon C, and Forrester C. An ergonomic evaluation of a patient handling device: the elevate and transfer vehicle. Appl Ergon (1997); 28(5-6):365-74

15.   Hignett S, Crumpton E, Ruszala S, Alexander P, Fray M, and Fletcher B. Evidence-based patient handling: systematic review. Nurs Stand (2003); 17(33):33-6

16.   Stetler CB, Burns M, Sander-Buscemi K, Morsi D, and Grunwald E. Use of evidence for prevention of work-related musculoskeletal injuries. Orthop Nurs (2003); 22(1):32-41

17.   Thomas DR, and Thomas YL. Interventions to reduce injuries when transferring patients: a critical appraisal of reviews and a realist synthesis. Int J Nurs Stud (2014); 51(10):1381-94

18.   Hignett S. Systematic review of patient handling activities starting in lying, sitting and standing positions. J Adv Nurs (2003); 41(6):545-52

**Clinical queries therapy/narrow:**

19.   Yassi A, Cooper JE, Tate RB, Gerlach S, Muir M, Trottier J, and Massey K. A randomized controlled trial to prevent patient lift and transfer injuries of health care workers. Spine (Phila Pa 1976) (2001); 26(16):1739-46

**screened through reference list of systematic reviews/reviews for relevant studies shown below:**

20.   Position statement on elimination of manual patient handling to prevent work-related musculoskeletal disorders. Prairie Rose (2004); 73(4):18-9

21.   Edlich RF, Winters KL, Hudson MA, Britt LD, and Long WB. Prevention of disabling back injuries in nurses by the use of mechanical patient lift systems. J Long Term Eff Med Implants (2004); 14(6):521-33

22.   Evanoff B, Wolf L, Aton E, Canos J, and Collins J. Reduction in injury rates in nursing personnel through introduction of mechanical lifts in the workplace. Am J Ind Med (2003); 44(5):451-7

23.   Foley ME, Keepnews D, and Worthington K. Identifying and using tools for reducing risks to patients and health care workers. Jt Comm J Qual Improv (2001); 27(9):494-9

24.   Garg A. Long-term effectiveness of “zero-lift program” in seven nursing homes and one hospital. University of Wisconsin – Thesis (1999)

25.   Nelson A, Gragala G, and Menzel N. Myths and facts about back injuries in nursing. Am J Nurs (2003); 103(2):32-40

26.   Nelson A, and Baptiste AS. Evidence-based practices for safe patient handling and movement. Online J Issues Nurs (2004); 9(3):4

27.   Nelson A, Lloyd JD, Menzel N, and Gross C. Preventing nursing back injuries: Redesigning patient handling tasks. AAOHN J (2003); 51(3):126-34

28.   Nelson A, Matz M, Chen F, Siddharthan K, Lloyd J, and Fragala G. Development and evaluation of a multifaceted ergonomics program to prevent injuries associated with patient handling tasks. Int J Nurs Stud (2006); 43(6):717-33

29.   Campo M, Shiyko MP, Margulis H, and Darragh AR. The effect of a safe patient handling program on rehabilitation outcomes. Arch Phys Med Rehabil (2013); 94(1):17-22

30.   Waters TR. When is it safe to manually lift a patient? Am J Nurs (2007); 107(8):53-8

31.   Verbeek J, Martimo KP, Karppinen J, Kuiker PP, Takala EP, and Viikari-Juntura E. Manual material handling advice and assistive devices for preventing and treating back pain in workers: a Cochrane Systematic Review. Occup Environ Med (2012); 69(1):79-80

32.   Britton E, Harris N, and Turton A. An exploratory randomized controlled trial of assisted practice for improving sit-to-stand in stroke patients in the hospital setting. Clin Rehabil (2008); 22(5):458-68

33.   Allison R, and Dennett R. Pilot randomized controlled trial to assess the impact of additional supported standing practice on functional ability post stroke. Clin Rehabil (2007); 21(7):614-9

34.   Boyne P, Israel S, and Dunning K. Speed-dependent body weight supported sit-to-stand training in chronic stroke: a case series. J Neurol Phys Ther (2011); 35(4):178-84

35.   Hignett S. Intervention strategies to reduce musculoskeletal injuries associated with handling patients: a systematic review. Occup Environ Med (2003); 60(9):E6

36.   Ore T. Evaluation of safety training for manual handling of people with disabilities in specialised group homes in Australia. Aust N Z J Public Health (2003); 27(1):64-9

37.   Edlich RF, Winters KL, Hudson MA, Britt LD, and Long WB. Prevention of disabling back injuries in nurses by the use of mechanical patient lift systems. J Long Term Eff Med Implants (2004); 14(6)521-33

38.   McGuire T, Moody J, and Hanson M. Managers’ attitudes towards mechanical aids. Nurs Stand (1997) 11(31):33-8

39.   Moody J, McGuire T, Hanson M, and Tigar F. A study of nurses’ attitudes towards mechanical aids. Nurs Stand (1996); 11(4):37-42

40.   Zhuang Z, Stobbe TJ, Hsiao H, Collins JW, and Hobbs GR. Biomechanical evaluation of assistive devices for transferring residents. Appl Ergon (1999); 30(4):285-94

41.   Daynard D, Yassi A, Cooper JE, Tate R, Norman R, and Wells R. Biomechanical analysis of peak and cumulative spinal loads during simulated patient-handling activities: a substudy of a randomized controlled trial to prevent lift and transfer injury of health care workers. Appl Ergon (2001); 32(3):199-214

42.   Silvia CE, Bloswick WS, Lillquist D, Wallace D, and Perkins MS. An ergonomic comparison between mechanical and manual patient transfer techniques. Work (2002); 19(1):19-34

43.   Evanoff B, Wolf L, Aton E, Canos J, and Collins J. Reduction in injury rates in nursing personnel through introduction of mechanical lifts in the workplace. Am J Ind Med (2003); 44(5):451-7

44.   Ruszala S, and Musa I. An evaluation of equipment to assist patient sit-to-stand activities in physiotherapy. Physiotherapy (2005); 91(1):35-41

45.   D’Arcy LP, Sasai Y, and Stearns SC. Do assistive devices, training, and workload affect injury incidence? prevention efforts by nursing homes and back injuries among nursing assistants. J Adv Nurs (2012); 68(4):836-45

46.   Darragh AR, Campo MA, Frost L, Miller M, Pentica M, and Margulis H. Safe-patient-handling equipment in therapy practice: implications for rehabilitation. Am J Occup Ther (2013); 67(1):45-53

47.   Garg A, and Kapellusch JM. Long-term efficacy of an ergonomics program that includes patient-handling devices on reducing musculoskeletal injuries to nursing personnel. Hum Factors (2012); 54(4):608-25

48.   Schoenfisch AL, Pompeii LA, Myers DJ, James T, Yeung YL, Fricklas E, and et al. Objective measures of adoption of patient lift and transfer devices to reduce nursing staff injuries in the hospital setting. Am J Ind Med (2011); 54(12):935-45

49.   Zhuang Z, Stobbe TJ, Collins JW, Hsiao H, and Hobbs GR. Psychophysical assessment of assistive devices for transferring patients/residents. Appl Ergon (2000); 31(1):35-44

50.   Mutch K. Changing manual-handling practice in a stroke rehabilitation unit. Prof Nurse (2004); 19(7):374-8

51.   Keir PJ, and MacDonell CW. Muscle activity during patient transfers: A preliminary study on the influence of lift assists and experience. Ergonomics (2004); 47(3):296-306

52.   Le Bon C, and Forrester C. An ergonomic evaluation of a patient handling device: The elevate and transfer vehicle. Appl Ergon (1997); 28(5-6):365-74

**Pedro**

**Simple Search:**

“Assistive transfer devices”:

- Identified 3 results (1 duplicate, 2 not relevant)
- Yassi A, Cooper JE, Tate RB, Gerlach S, Muir M, Trottier J, and Massey K. A randomized controlled trial to prevent patient lift and transfer injuries of health care workers. Spine (Phila Pa 1976) (2001); 26(16):1739-46

“Sit to stand aid”:

- Identified 2 results (1 duplicate, 1 not relevant)
- Ruszala S, and Musa I. An evaluation of equipment to assist patient sit-to-stand activities in physiotherapy. Physiotherapy (2005); 91(1):35-41

“Sit to stand devices”:

- Identified 3 results (3 not relevant)

“Sit to stand equipment”:

- Identified 1 result (1 duplicate)
- Ruszala S, and Musa I. An evaluation of equipment to assist patient sit-to-stand activities in physiotherapy. Physiotherapy (2005); 91(1):35-41

“Sit to stand assist”:

- Identified 2 results (1 duplicate, 1 not relevant)
- Ruszala S, and Musa I. An evaluation of equipment to assist patient sit-to-stand activities in physiotherapy. Physiotherapy (2005); 91(1):35-41

“Transfer device”:

- Identified 9 results (1 duplicate, 8 not relevant)
- Yassi A, Cooper JE, Tate RB, Gerlach S, Muir M, Trottier J, and Massey K. A randomized controlled trial to prevent patient lift and transfer injuries of health care workers. Spine (Phila Pa 1976) (2001); 26(16):1739-46

“Transfer equipment”

- Identified 5 results (1 duplicate, 4 not relevant)
- Yassi A, Cooper JE, Tate RB, Gerlach S, Muir M, Trottier J, and Massey K. A randomized controlled trial to prevent patient lift and transfer injuries of health care workers. Spine (Phila Pa 1976) (2001); 26(16):1739-46

**CINAHL DATABASE search:**

**Search Terms:**

“Lifting and transfer equipment” – “explode” and “major concept” selected

AND

“patient handling” – “explode” and “major concept” selected

**Identified**: 75 results

1. Hospitals consider better patient handling equipment. BRIEF HOSP SAF 2017 07;25(7):7-11.
2. INTERVIEWS WITH SAFE PATIENT HANDLING EQUIPMENT VENDORS...Steven Smith. AM J SAFE PATIENT HANDLING MOVEMENT 2015 09;5(3):122-126.
3. Safe lifting techniques. REHAB MANAGE 2010 07;23(6):32-32.
4. Allen R, Jackson S, Marsden H, McLellan DL, Gore S. Transferring people safely with manual handling equipment. Clin Rehabil 2002 05;16(3):329-337.
5. Blood R. Safe moving and handling of individuals. NURS RESIDENTIAL CARE 2005 10;7(10):439-441.
6. BONOMI J, BROOKS S, CHAPMAN T, GARRISON E, WHITE L. Implementing a Safe Patient Handling Program in a Community Hospital Setting. International Journal of Safe Patient Handling & Mobility (SPHM) 2017 06;7(2):74-81.
7. Burnfield JM, McCrory B, Shu Y, Buster TW, Taylor AP, Goldman AJ. Comparative Kinematic and Electromyographic Assessment of Clinician- and Device-Assisted Sit-to-Stand Transfers in Patients With Stroke. Phys Ther 2013 10;93(10):1331-1341.
8. Capewell RA, Brown DA, Rockefeller K. Evaluation of a Tool Kit for Safe Patient Handling in the Home Care Setting. AM J SAFE PATIENT HANDLING MOVEMENT 2011 03;1(1):22-29.
9. Chadwick M. More principles for a positive approach to manual handling. NURS RESIDENTIAL CARE 2008 03;10(3):151-153.
10. CLARK M, PHILLIPS L, KNIBBE HJJ. Lifting and Transfer Devices: a Bridge between Safe Patient Handling and Pressure Ulcer Prevention. AM J SAFE PATIENT HANDLING MOVEMENT 2015 12;5(4):154-160.
11. Danos TS. Early Mobility: Good for the Patient, Good for the Facility. REHAB MANAGE 2013 09;26(7):20-23.
12. DAVIS D, JENSEN AD, KUZMA T. International Round Table Discussion: Safe Patient Handling & Mobility Technology. International Journal of Safe Patient Handling & Mobility (SPHM) 2017 12;7(4):152-157.
13. Eglitis N, Corrigan E, Sweeney M, Pierce J, Stoy W. Lifting & Moving. JEMS 2017 10:40-46.
14. Hampton S, Abraham A. Moving and repositioning residents in care homes safely. NURS RESIDENTIAL CARE 2017 02;19(2):78-83.
15. HOWARD N. Safe Patient Handling & Mobility Programs and Policies: Short Term Vs Long Term Evaluation. AM J SAFE PATIENT HANDLING MOVEMENT 2016 09;6(3):130-131.
16. Jenkins L, Egersett M. Better lifts and transfers. REHAB MANAGE 2004 2004;17(9):24-27.
17. Keir PJ, MacDonell CW. Muscle activity during patient transfers: a preliminary study on the influence of lift assists and experience. Ergonomics 2004 02/26;47(3):296-306.
18. KLING MY, WEST N. Radiology and Safe Patient Handling. AM J SAFE PATIENT HANDLING MOVEMENT 2015 12;5(4):148-153.
19. Knibbe HJJ, Knibbe NE, Klaassen AJW. Safe patient handling program in critical care using peer leaders: lessons learned in the Netherlands. Crit Care Nurs Clin North Am 2007 2007;19(2):205-211.
20. Kutash M, Short M, Shea J, Martinez M. The lift team's importance to a successful safe patient handling program. J Nurs Adm 2009 04;39(4):170-175.
21. LAVIGNE A, ARNOLD M. Decision Making for Safe Patient Handling and Mobility Technology in an Early Mobility Program: a Case Report. AM J SAFE PATIENT HANDLING MOVEMENT 2016 06;6(2):65-72.
22. Lee S, Lee JH, Gershon RRM. Musculoskeletal Symptoms in Nurses in the Early Implementation Phase of California's Safe Patient Handling Legislation. Res Nurs Health 2015 06;38(3):183-193.
23. Logan P. Moving and handling: protecting yourself. Community Nurse 1996 1996;2(3):22-24.
24. Long F. Safe lift strategy. REHAB MANAGE 2008 07;21(6):28-29.
25. Lorio AK. Transfer dependent: numerous devices and methods are available to therapists who need to move a medically fragile patient. REHAB MANAGE 2005 2005;18(7):22-26.
26. Marble C. Ems Gets a Lift. JEMS 2017 10:52-53.
27. Mechan P. Challenging the Myth that it Takes Too Long to use Safe Patient Handling and Mobility Technology: a Task Time Investigation. AM J SAFE PATIENT HANDLING MOVEMENT 2014 06;4(2):46-51.
28. Monaghan HM. The Challenge of Change: Why are Staff Resistant to using Safe Patient Handling Equipment? AM J SAFE PATIENT HANDLING MOVEMENT 2011 06;1(2):19-24.
29. Motacki K, Motacki LM. Safe patient handling and movement in a pediatric setting. Pediatr Nurs 2009 Jul;35(4):221-225.
30. Murphy SL, Nyquist LV, Strasburg DM, Alexander NB. Bath transfers in older adult congregate housing residents: assessing the person-environment interaction. J Am Geriatr Soc 2006 08;54(8):1265-1270.
31. Nelson A, Owen B, Lloyd JD, Fragala G, Matz MW, Amato M, et al. Safe patient handling & movement. Am J Nurs 2003 03;103(3):32-44.
32. Owen BD, Welden N, Kane J. What are we teaching about lifting and transferring patients? Res Nurs Health 1999 02;22(1):3-13.
33. Pain H, Jackson S, McLellan DL, Gore S. User evaluation of handling equipment for moving dependent people in bed. TECHNOL DISABIL 1999 08;11(1):13-19.
34. Pellino TA, Owen B, Knapp L, Noack J. The evaluation of mechanical devices for lateral transfers on perceived exertion and patient comfort. Orthop Nurs 2006 Jan;25(1):4-12.
35. Rossi CG, Rocha RM, Alexandre NMC. The transfer of patients and its ergonomic aspects: a study conducted at a university hospital lifting center. REV ESC ENFERMAGEM USP 2001 2001;35(3):249-256.
36. Rugs D, Elnitsky C, Lind J, Powell-Cope G. Mitigating Adverse Events with Patient Handling Equipment: a Photo-Narrative Project. AM J SAFE PATIENT HANDLING MOVEMENT 2012 12;2(4):112-118.
37. Tang R, Poklar M, Domke H, Moore S, Kapellusch J, Garg A. Sit-To-Stand Lift: Effects of Lifted Height on Weight Borne and Upper Extremity Strength Requirements. Res Nurs Health 2017 02;40(1):9-14.
38. Trevelyan J. Handling aids for nurses and carers. Nurs Times 1996 02/21;92(8):58-60.
39. Warren G. CONTINUING PROFESSIONAL DEVELOPMENT. Moving and handling: reducing risk through assessment. Nurs Stand 2016 6;30(40):49-58.
40. Z. Zhuang. Ergonomic evaluation of assistive devices and manual methods for resident-handling tasks in nursing homesWEST VIRGINIA UNIVERSITY; 1995.
41. Zinnecker L. Safe patient movement for therapists. REHAB MANAGE 2007 07;20(6):32-37.

**CINAHL DATABASE search:**

**Search Terms:**

“Lifting and transfer equipment” – “explode” and “major concept” selected

AND

“patient safety” – “explode” and “major concept” selected

**Identified: 55 results**

1. Could a focus on patient safety drive adoption of lifting and handling programs in health care? Hosp Employee Health 2015 07;34(7):76-77.
2. Nurses reveal how patient handling is unsafe. MASS NURSE ADVOCATE 2011 12;82(6):12-13.
3. Rehab patients gain from safe lifts. Hosp Employee Health 2011 11;30(11):129-130.
4. Bogue BZ. Handle with care. Provider 2010 2010;36(1):39-43.
5. Conti MT, Johnsen V. Is your facility equipped for safe patient handling? Nurs Manage 2011 04;42(4):46-47.
6. Enos L, Monaghan HM, Thomas S. Comprehensive Review of SPHM Articles from 2005-2016. AM J SAFE PATIENT HANDLING MOVEMENT 2016 03/02;6:1-28.
7. Kennedy B, Kopp T. Safe patient handling protects employees too. Nursing 2015 08;45(8):65-67.
8. Krill C, Staffileno BA, Raven C. Empowering staff nurses to use research to change practice for safe patient handling. Nurs Outlook 2012 May;60(3):157-162.e1.
9. Krupp A, Anderson B. Standardized use of Safe Patient Handling Equipment in the Icu: a Unit-Based Quality Improvement Project. AM J SAFE PATIENT HANDLING MOVEMENT 2014 12;4(4):122-128.
10. Mandelstam M. Safe Use of Disability Equipment and Manual Handling: Legal Aspects - Part 1, Disability Equipment. BR J OCCUP THER 2001 1;64(1):9-16.
11. Ngo M, Schneider-Kolsky M, Baird M. The attitudes of Australian radiography students towards the use of assistive transfer devices to reduce biomechanical stress in the clinical setting. Radiography 2013 05;19(2):125-129.
12. Patrick G. Risks of moving and handling. Nurs Stand 2016 08/24;30(52):64-65.
13. Peck RL. Elements of a safe mobility program...Guy Gragala. NURS HOMES LONG TERM CARE MANAGE 2007 01;56(1):68-86.
14. Rose MA, Drake DJ, Baker G, Jr WF, Waters W, Pokorny M. Tech update. Caring for morbidly obese patients: safety considerations for nurse administrators. Nurs Manage 2008 11;39(11):47-50.
15. Sachs A. Nurses, patients alike benefit from safe patient handling. Am Nurse 2010 Sep;42(5):9-9.
16. Soleil C. Handle with Care Campaign: safe patient handling -- make it a business decision. Alaska Nurse 2005 2005;55(1):16-16.
17. Stevenson J, Hinsch C, Bartold K, Briggs L, Tyler L. Exploring the Influence of Clinical and Classroom Training on Advocacy for Safe Patient Handling Practices Among Student Physical Therapists. J PHYS THER EDUC 2015 01;29(1):60-69.
18. Studer M. Patient Lifts: Balancing Safety with Recovery. REHAB MANAGE 2012 03;25(2):26-29.
19. Wright M, Taylor C, Sagar M. Health & safety. Giving a lift to nursing education: teaching tomorrow's nurses best-practice patient handling skills. Am J Nurs 2004 11;104(11):112-112.

**Thesis and Dissertation Search on Proquest – Mar. 16/18**

| **Terms Used** | **Number of Results** | **Relevant Articles** |
| --- | --- | --- |
| 1. “standing lift” AND “safety” | 12 | 0 |
| 1. “active assist transfer” | 90 | 0 |
| 1. “Sara stedy” | 0 | 0 |
| 1. “standing aid” AND “community” | 77 | 0 |
| 1. “standing aid” AND “community” AND “transfer” | 4 | 0 |
| 1. “standing lift” | 76 | 0 |
| 1. “transfer aid” AND “occupational therapy” | 3 | 0 |
| 1. “standing lift” AND “occupational therapy” | 3 | 0 |
| 1. “active assist transfer” AND “occupational therapy” | 0 | 0 |
| 1. “transfer aid” AND “physical therapy” | 5 | 0 |
| 1. “standing lift” AND “physical therapy” | 2 | 0 |
| 1. “pivot transfer” | 64 | 0 |
| 1. “pivot transfer” AND “patient” | 1 | 0 |
| 1. “pivot transfer” AND “safe” | 3 | 0 |
| 1. “pivot transfer” AND “physical therapy” | 2 | 0 |
| 1. “pivot transfer” AND “occupational therapy” | 0 | 0 |
| 1. “transfer aid” AND “safe” | 32 | 0 |
| 1. “sit to stand aid” | 10 | 0 |
| 1. “transfer support” AND “occupational therapy” | 10 | 0 |
| 1. “transfer support” AND “physical therapy” | 34 | 1 |
| 1. “active transfer” AND “physical therapy” | 18 | 0 |
| 1. “active transfer” AND “occupational therapy” | 2 | 0 |
| 1. “transfer support” AND “equipment” AND “safe” | 27 | 0 |
| 1. “transfer” AND “hospital” AND “safe” AND “equipment” | 4 | 0 |
| 1. “transfer” AND “safe” AND “equipment” | 159 | 1 |
| 1. “active transfer” AND “safe” AND “equipment” | 8 | 0 |
| 1. “sit to stand” AND “equipment” | 5 | 0 |
| 1. “pivot transfer” AND “equipment” | 1 | 0 |
| 1. “transfer aid” AND “equipment” | 57 | 0 |
| 1. “manual transfer” AND “equipment” | 59 | 0 |

**Theses and Dissertations Found:**

- From #20: “Investigating the Impacts of Barriers and Facilitators Affecting the Adoption of Lifting Devices in Health Care Facilities” (2015) – A dissertation.
- From #25: “Patient’s Perceptions of Minimal Lift Equipment” (2010) – A thesis.

**Conference Proceedings Search on PapersFirst – Mar. 18/18**

| **Terms Used** | **Number of Results** | **Relevant Articles** |
| --- | --- | --- |
| 1. “active assist transfer” | 0 | 0 |
| 1. “Sara stedy” | 0 | 0 |
| 1. “standing aid” | 0 | 0 |
| 1. “standing lift” | 0 | 0 |
| 1. “transfer aid” | 5 | 1 |
| 1. “pivot transfer” | 0 | 0 |
| 1. “sit to stand” | 104 | 2 |
| 1. “transfer support” | 5 | 0 |
| 1. “active transfer” | 13 | 0 |
| 1. “transfer” AND “safe” AND “equipment” | 0 | 0 |
| 1. “manual transfer” | 0 | 0 |
| 1. “patient transfer” | 30 | 2 |
| 1. “patient safety” AND “transfer” | 6 | 1 |
| 1. “patient safety” AND “two person” | 0 | 0 |

**Conference Proceedings Found:**

- From “transfer aid”: “Low Budget Commercial Development of a Transfer Aid: A Case Study” (2003), Craddock – couldn’t locate source
- From “sit to stand”: “A Cable-Based System for Aiding Elderly People in Sit-to-Stand Transfer” (2008)
- From “sit to stand”: “Optimization of sit to stand motions of elderly people for the design and control of physical assistive devices” (2014), Mombaur
- From “patient transfer”: “A biomechanic and neuromotor evaluation of patient transfer techniques” (1995), Hagberg – couldn’t locate source
- From “patient transfer”: “Patient transfer techniques evaluation” (1995), Hagberg – couldn’t locate source
- From “patient safety” AND “transfer”: “Biomechanical Load on the Lumbar Spine for Health-care Workers During Patient Transfer Activities” (2005), Tartaglia

**Conference Proceedings Search on ProceedingsFirst – Mar. 18/18**

| **Terms Used** | **Number of Results** | **Relevant Articles** |
| --- | --- | --- |
| 1. “active assist transfer” | 0 | 0 |
| 1. “Sara stedy” | 0 | 0 |
| 1. “standing aid” | 0 | 0 |
| 1. “standing lift” | 0 | 0 |
| 1. “transfer aid” | 10 | 1 |
| 1. “pivot transfer” | 0 | 0 |
| 1. “sit to stand” | 133 | 0 |
| 1. “transfer support” | 7 | 0 |
| 1. “active transfer” | 6 | 0 |
| 1. “transfer” AND “safe” AND “equipment” | 675 | 0 |
| 1. “manual transfer” | 0 | 0 |
| 1. “patient transfer” | 40 | 0 |
| 1. “patient safety” AND “transfer” | 120 | 0 |
| 1. “patient safety” AND “two person” | 0 | 0 |

*first 100 search results reviewed regardless of # of results

**Conference Proceedings Found:**

- From “transfer aid”: “Advancement of Assistive technology in Europe; Assistive technology shaping the future”, 2003 -> “Enhanced Independence in Daily Living by Means of a Novel Mobility Aid” (Borgolte, U)

**Monographs Search on Canadian Health Research Collection – Mar. 25/18**

| **Terms Used** | **Number of Results** | **Relevant Sources** |
| --- | --- | --- |
| 1. “active assist transfer” | 0 | 0 |
| 1. “Sara stedy” | 0 | 0 |
| 1. “standing aid” | 1 | 0 |
| 1. “standing lift” | 0 | 0 |
| 1. “transfer aid” | 0 | 0 |
| 1. “pivot transfer” | 2 | 0 |
| 1. “sit to stand” | 2 | 0 |
| 1. “transfer support” | 12 | 0 |
| 1. “active transfer” | 1 | 0 |
| 1. “transfer” AND “safe” AND “equipment” | 1736 | 1 |
| 1. “manual transfer” | 5 | 0 |
| 1. “patient transfer” | 107 | 1 |
| 1. “patient safety” AND “transfer” | 816 | 0 |
| 1. “patient safety” AND “two person” | 6 | 0 |

*first 5 pages or 100 search results reviewed regardless of # of results

**Monographs Found:**

- From “transfer” AND “safe” AND “equipment”: “Patient lifts and transfer equipment: a review of clinical and cost-effectiveness and guidelines”, 2010, Canadian Agency for Drugs and Technologies in Health
- From “patient transfer”: “Intervention in health-care settings to protect musculoskeletal health a systematic review: full report”, 2006, Institute for Work & Health

**Google Search**

| **Terms Used (Added “filetype.pdf” for all search terms)** | **Number of Results** | **Relevant Articles in First 5 Pages** |
| --- | --- | --- |
| 1. “Sara stedy safety” | 64,700 | 0 |
| 1. “Active assist transfer” | 2,840,000 | 0 |
| 1. “Sara stedy” | 7,110 | 2 |
| 1. “Sara stedy community” | 136,000 | 0 |
| 1. “Sara stedy patient” | 9 | 0 |
| 1. “Standing lift safety” | 48,900 | 0 |
| 1. “Standing lift patient” | 38 | 1 |
| 1. “Standing lift role” | 38 | 0 |
| 1. “Patient transfer equipment” | 260,000 | 0 |
| 1. “Patient transfer assist” | 261,000 | 1 |
| 1. “Patient transfer safety” | 330,000 | 1 |
| 1. “Active assist transfer physiotherapy” | 186,000 | 0 |
| 1. “Active assist transfer occupational therapy” | 301,000 | 0 |
| 1. “Partial weight bearing transfer equipment” | 502,000 | 0 |
| 1. “Standing lift community” | 8 | 0 |
| 1. “Standing lift transfer” | 13 | 0 |
| 1. “Standing lift hospital” | 12 | 0 |
| 1. “Sara stedy role” | 25 | 0 |
| 1. “Sara stedy safe” | 201,000 | 3 |
| 1. “Transfer aid patient” | 6,990,000 | 3 |
| 1. “Transfer aid safety” | 9,080,000 | 0 |
| 1. “Patient safety two person” | 1,560,000 | 0 |

**Google Searches Found:**

From “Sara stedy”: “Evaluation of a Continued Safe Patient and Handling Program”, 2014, Daily

From “Sara stedy”: “Cocoon: a safe haven for patients at risk of falling” -> “Just Do It, Making it Better for You”, 2014-2015

From “Standing lift patient”: <http://www.mccc.edu/~behrensb/documents/210wk3TransferTraining_000.pdf>

From “Patient transfer assist”: <http://www.lni.wa.gov/safety/sprainsstrains/IdeasBank/documentsfiles/idea109.pdf>

From “Patient transfer safety”: <https://intermountainhealthcare.org/ext/Dcmnt?ncid=520487442>

From “Sara stedy safe”: <https://www.skiffmed.com/media/cms/Vital_Signs_8912_71979AF9E1E9F.pdf>, <http://www.anaheimregionalmc.com/documents/Students-Contractors/Registry-Student-Orientation-Guidelines-2017.pdf>, <http://www.anaheimregionalmc.com/documents/Students-Contractors/Registry-Student-Orientation-Guidelines-2017.pdf>

From “Transfer aid patient”:

<https://www.worksafe.vic.gov.au/__data/assets/pdf_file/0016/211273/ISBN-Transferring-people-safely-handbook-2009-07.pdf>

<http://www.ezlifts.com/products/get_file.cfm?DocumentID=111>

<https://www.etac.com/media/5131/sit-to-stand-workbook.pdf>
